# Supplementary material for: Regularized inversion of aerosol hygroscopic growth factor probability density function: Application to humidity-controlled fast integrated mobility spectrometer measurements
Source: Copernicus journal article supplement (doi:10.5194/amt-2021-334), 2021-11-01
Supplement: Supplementary file 1 [file amt-2021-334-supplement.pdf]

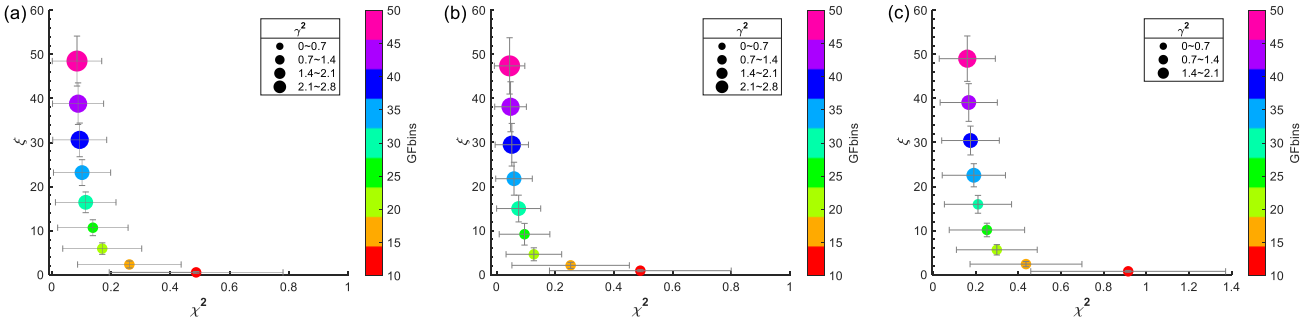

**Fig. S1.** “L-curve” showing the dependence of reconstruction residual,  $\chi^2$ , and the smoothness,  $\xi$ , on the number of GF bins of pre-defined GF-PDFs with (a) one mode, (b) two modes, and (c) three modes, respectively. The symbol size represents the error in inverted GF-PDF,  $\gamma^2$ . Whiskers represent standard deviation. The inversion is conducted using unregularized LSQ method.

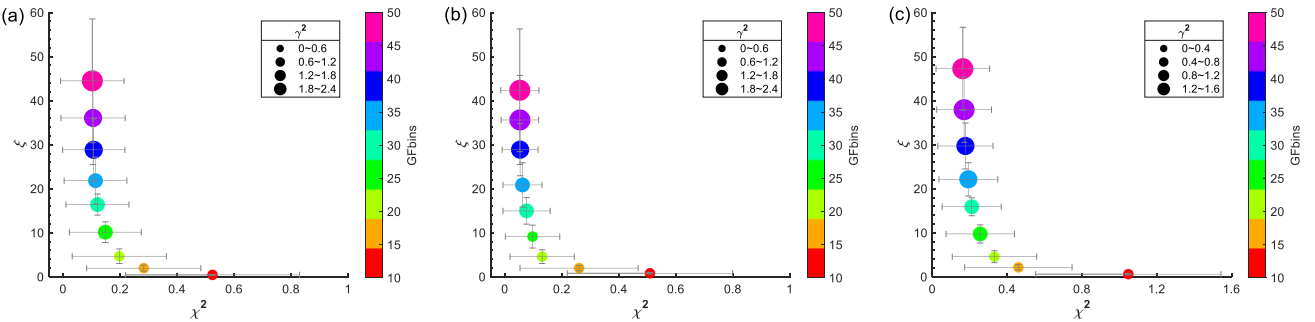

**Fig. S2.** “L-curve” showing the dependence of reconstruction residual,  $\chi^2$ , and the smoothness,  $\xi$ , on the number of GF bins of pre-defined GF-PDFs with (a) one mode, (b) two modes, and (c) three modes, respectively. The symbol size represents the error in inverted GF-PDF,  $\gamma^2$ . Whiskers represent standard deviation. The inversion is conducted using 0<sup>th</sup> order Tikhonov regularization method.

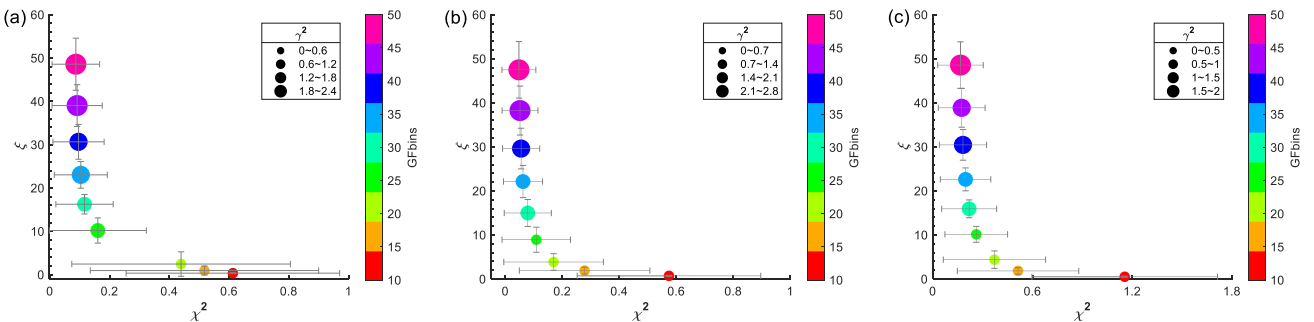

**Fig. S3.** “L-curve” showing the dependence of reconstruction residual,  $\chi^2$ , and the smoothness,  $\xi$ , on the number of GF bins of pre-defined GF-PDFs with (a) one mode, (b) two modes, and (c) three modes, respectively. The symbol size represents the error in inverted GF-PDF,  $\gamma^2$ . Whiskers represent standard deviation. The inversion is conducted using 1<sup>st</sup> order Tikhonov regularization method.

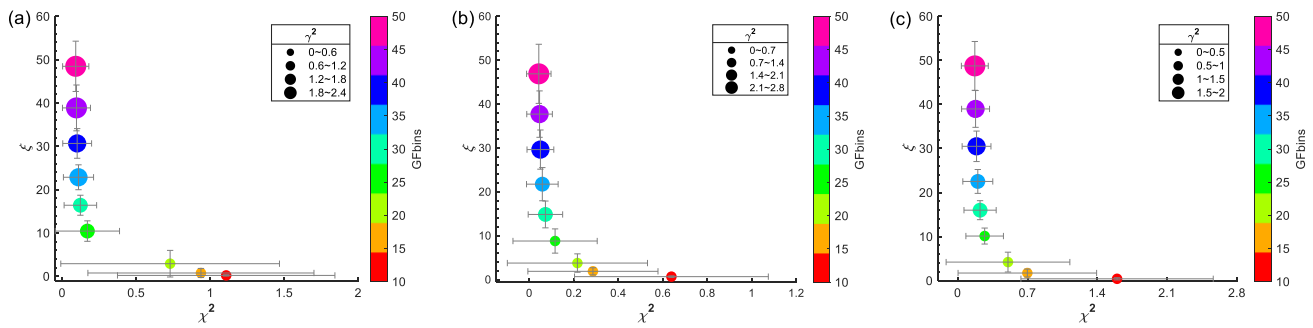

15 **Fig. S4.** “L-curve” showing the dependence of reconstruction residual,  $\chi^2$ , and the smoothness,  $\xi$ , on the number of GF bins of pre-defined GF-PDFs with (a) one mode, (b) two modes, and (c) three modes, respectively. The symbol size represents the error in inverted GF-PDF,  $\gamma^2$ . Whiskers represent standard deviation. The inversion is conducted using 2<sup>nd</sup> order Tikhonov regularization method.
